# Supplementary material for: A non-reductive electrochemical sensor for ultrasensitive detection of pM-level TNT
Source: Royal Society of Chemistry journal article supplement (doi:10.1039/c8ay01522h), 2018-01-01
Supplement: c8ay01522h1.pdf [file c8ay01522h1.pdf]

## Supplementary Material

### A Non-Reductive Electrochemical Sensor for Ultrasensitive Detection of pM-Level TNT

Juren Xi<sup>a</sup> and Baishun Zhang<sup>\*a</sup>

<sup>a</sup>No. 559 Wangjiang West Road, Anhui Public Security College, China, 230031. Email: zbs01@163.com

Figure S1. The sensitivities of PANI/AuNPs/CNTs and PANI/CNTs composite electrodes with the same 30-layer PANI to TNT.

Figure S2. The stability of PANI/AuNPs/CNTs (with 30 PANI layers) composite electrode.

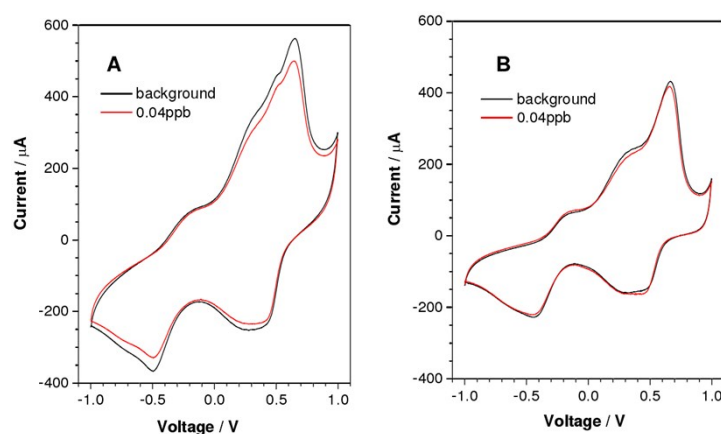

Figure S1. The CV curves of composite electrodes (with 30 PANI layers) with addition of 0.04 ppb TNT: (A) PANI/AuNPs/CNTs; (B) PANI/ CNTs. Potential scan rate: 500 mV•s<sup>-1</sup>; electrolyte: 0.5 M NaCl.

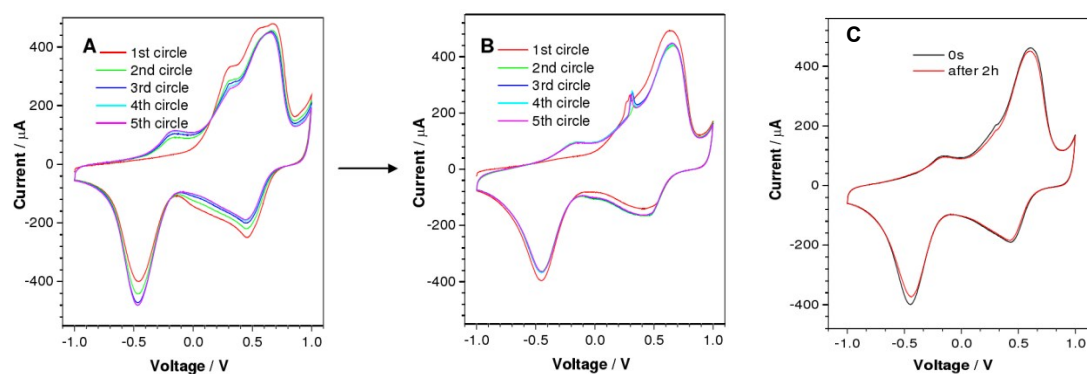

Figure S2. The stability of PANI/AuNPs/CNTs (with 30 PANI layers) composite electrode. (A) Cyclically scan 5 times for the first time in the potential range of +1.0 to -1.0 V. (B) Cyclically scan the second 5 times. (C) Cyclically scan after 2 hours. (Potential scan rate:  $500 \text{ mV}\cdot\text{s}^{-1}$ ; electrolyte: 0.5 M NaCl.)
